# Supplementary material
Source: Springer Nature journal article supplement (https://www.springermedizin.de/resource/supplementary/12890_2014_627_MOESM2_ESM.pdf/9505444)

Activin A, Inhibin  $\beta_A$

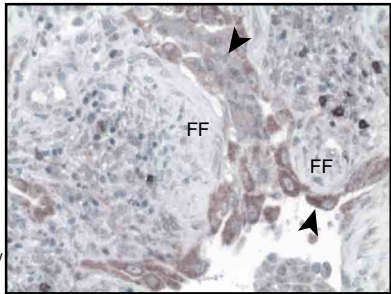

Activin B, Inhibin  $\beta_B$

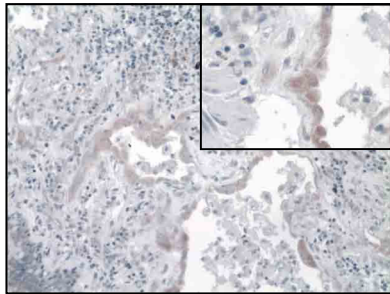

Follistatin

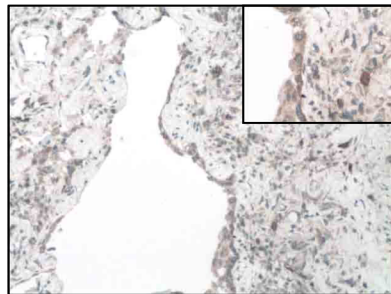

IPF/  
UIP

Ctrl

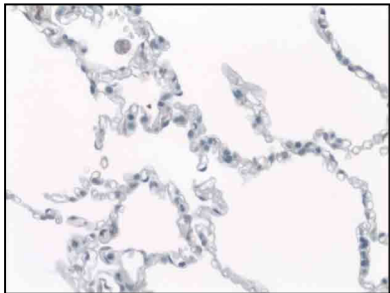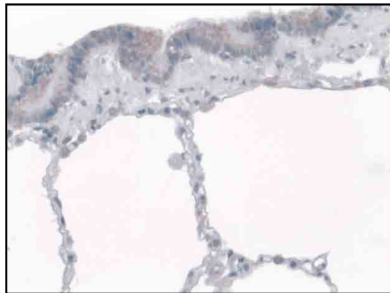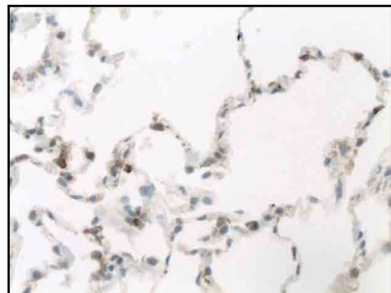

Supplement: MOESM2 [file 9505444]
